# Supplementary material
Source: PubMed Central journal article supplement (PMC3653373)
Supplement: Supp_Table1.pdf [file Supp_Table1.pdf]

## Supplementary Data

SUPPLEMENTARY TABLE S1. PUTATIVE BREAKPOINTS OF MOSAIC VIRUS VARIANTS

| <i>Sequence</i> | <i>Recombinant<sup>a</sup></i> | <i>No. of supporting sites fragment 1</i> | <i>Putative breakpoint 1</i> | <i>No. of supporting sites fragment 2</i> | <i>Putative breakpoint 2</i> | <i>No. of supporting sites fragment 3</i> | <i>Putative breakpoint 3</i> | <i>No. of supporting sites fragment 4</i> |
|-----------------|--------------------------------|-------------------------------------------|------------------------------|-------------------------------------------|------------------------------|-------------------------------------------|------------------------------|-------------------------------------------|
| 54-17           | B/CRF19                        | 13                                        | 2320–2374                    | 59                                        |                              |                                           |                              |                                           |
| 54-4            | CRF19/B                        | 52                                        | 2613–2691                    | 21                                        |                              |                                           |                              |                                           |
| 54-22           | CRF19/B                        | 52                                        | 2613–2691                    | 21                                        |                              |                                           |                              |                                           |
| 54-24           | CRF19/B                        | 79                                        | 3030–3050                    | 13                                        |                              |                                           |                              |                                           |
| 54-25           | CRF19/B                        | 49                                        | 2553–2588                    | 23                                        |                              |                                           |                              |                                           |
| 54-8            | CRF19/B/CRF19                  | 48                                        | 2553–2588                    | 23                                        | 3231–3257                    | 7                                         |                              |                                           |
| 85-2            | CRF19/B                        | 40                                        | 2397–2442                    | 29                                        |                              |                                           |                              |                                           |
| 85-3            | CRF19/B                        | 41                                        | 2397–2408                    | 29                                        |                              |                                           |                              |                                           |
| 85-9            | CRF19/B                        | 40                                        | 2375–2408                    | 30                                        |                              |                                           |                              |                                           |
| 85-12           | CRF19/B                        | 39                                        | 2397–2442                    | 29                                        |                              |                                           |                              |                                           |
| 85-13           | CRF19/B                        | 39                                        | 2397–2442                    | 29                                        |                              |                                           |                              |                                           |
| 85-14           | CRF19/B                        | 41                                        | 2397–2408                    | 30                                        |                              |                                           |                              |                                           |
| 85-15           | CRF19/B                        | 42                                        | 2436–2442                    | 29                                        |                              |                                           |                              |                                           |
| 85-17           | CRF19/B                        | 41                                        | 2397–2442                    | 29                                        |                              |                                           |                              |                                           |
| 85-23           | CRF19/B                        | 39                                        | 2397–2442                    | 29                                        |                              |                                           |                              |                                           |
| 85-19           | CRF19/B                        | 39                                        | 2363–2408                    | 30                                        |                              |                                           |                              |                                           |
| 85-10           | CRF19/B                        | 40                                        | 2375–2408                    | 30                                        |                              |                                           |                              |                                           |
| 85-16           | CRF19/B                        | 39                                        | 2397–2442                    | 29                                        |                              |                                           |                              |                                           |
| 85-4            | CRF19/B                        | 45                                        | 2487–2540                    | 26                                        |                              |                                           |                              |                                           |
| 85-27           | CRF19/B                        | 45                                        | 2487–2541                    | 25                                        |                              |                                           |                              |                                           |
| 85-8            | CRF19/B                        | 49                                        | 2553–2588                    | 23                                        |                              |                                           |                              |                                           |
| 85-26           | CRF19/B                        | 48                                        | 2553–2588                    | 23                                        |                              |                                           |                              |                                           |
| 85-24           | CRF19/B                        | 48                                        | 2553–2588                    | 23                                        |                              |                                           |                              |                                           |
| 85-21           | CRF19/B                        | 49                                        | 2553–2588                    | 23                                        |                              |                                           |                              |                                           |
| 85-5            | CRF19/B                        | 49                                        | 2553–2588                    | 23                                        |                              |                                           |                              |                                           |
| 85-25           | CRF19/B                        | 48                                        | 2553–2588                    | 23                                        |                              |                                           |                              |                                           |
| 85-7            | CRF19/B                        | 49                                        | 2553–2588                    | 24                                        |                              |                                           |                              |                                           |
| 85-11           | CRF19/B                        | 79                                        | 3119–3137                    | 10                                        |                              |                                           |                              |                                           |
| 85-1            | B/CRF19/B                      | 8                                         | 2140–2168                    | 17                                        | 2397–2442                    | 29                                        |                              |                                           |
| 85-18           | B/CRF19/B                      | 11                                        | 2248–2282                    | 8                                         | 2375–2408                    | 30                                        |                              |                                           |
| 85-6            | CRF19/B/CRF19/B                | 38                                        | 2363–2364                    | 15                                        | 2943–2987                    | 4                                         | 3052-3079                    | 12                                        |
| 87-15           | CRF19/B                        | 41                                        | 2397–2442                    | 29                                        |                              |                                           |                              |                                           |
| 87-16           | CRF19/B                        | 40                                        | 2397–2442                    | 29                                        |                              |                                           |                              |                                           |
| 87-1            | CRF19/B                        | 39                                        | 2397–2442                    | 29                                        |                              |                                           |                              |                                           |
| 87-3            | CRF19/B                        | 41                                        | 2397–2442                    | 29                                        |                              |                                           |                              |                                           |
| 87-11           | CRF19/B                        | 41                                        | 2397–2408                    | 30                                        |                              |                                           |                              |                                           |
| 87-6            | CRF19/B                        | 39                                        | 2375–2442                    | 25                                        |                              |                                           |                              |                                           |
| 87-12           | CRF19/B                        | 44                                        | 2487–2540                    | 26                                        |                              |                                           |                              |                                           |
| 87-2            | CRF19/B                        | 48                                        | 2553–2588                    | 23                                        |                              |                                           |                              |                                           |
| 87-4            | CRF19/B                        | 49                                        | 2553–2588                    | 23                                        |                              |                                           |                              |                                           |
| 87-8            | CRF19/B                        | 49                                        | 2553–2588                    | 23                                        |                              |                                           |                              |                                           |
| 87-5            | CRF19/B                        | 49                                        | 2553–2588                    | 23                                        |                              |                                           |                              |                                           |
| 87-7            | CRF19/B                        | 48                                        | 2553–2588                    | 23                                        |                              |                                           |                              |                                           |
| 87-13           | CRF19/B                        | 47                                        | 2553–2588                    | 23                                        |                              |                                           |                              |                                           |
| 87-14           | B/CRF19/B                      | 15                                        | 2409–2435                    | 8                                         | 2553–2588                    | 23                                        |                              |                                           |
| S87-4           | CRF19/B                        | 41                                        | 2397–2408                    | 30                                        |                              |                                           |                              |                                           |
| S87-7           | CRF19/B                        | 42                                        | 2436–2442                    | 29                                        |                              |                                           |                              |                                           |
| S87-20          | CRF19/B                        | 48                                        | 2553–2588                    | 23                                        |                              |                                           |                              |                                           |

<sup>a</sup>Typing and breakpoint analysis performed using SimPlot.
